# Supplementary material
Source: Research Square preprint supplement (doi:10.21203/rs.3.rs-9291682/v1)
Supplement: Supplementary file 1 [file 3357303cff415c0b4e6de7d3.docx]

**Al-Hassa Oasis as a hotspot for plant diversity in Eastern Saudi Arabia**

**Kamal H. Shaltout1 & Yassin M. Al-Sodany2***

**Appendix 1. The recorded vascular plants in Al-Hassa hotspot, Eastern Sudi Arabia.**

| **Species** | **Family** | **Life**  **Form** | **Habit** | **Chorotype** | **Uses** | **LK** | **SM** | **SD** | **SS** | **WB** | **CP** | **NP** | **RS** | **RL** | **WA** |
| --- | --- | --- | --- | --- | --- | --- | --- | --- | --- | --- | --- | --- | --- | --- | --- |
| **Pteridophyta** |  |  |  |  |  |  |  |  |  |  |  |  |  |  |  |
| *Adiantum capillus-veneris L.* | Adiantaceae | GH | Perennial | COSM | M,G,F |  |  |  |  | + |  |  |  |  |  |
| *Ceratopteris thalictroides (L.) Brongn.* | Parakeriaceae | HH | Hydrophte | TR+PAN | M,G,F,O |  |  |  |  | + |  |  |  |  |  |
| **Dicotyledonae** |  |  |  |  |  |  |  |  |  |  |  |  |  |  |  |
| *Acacia tortolis* | Fabaceae | PH | Tree | SZ | M, G, F, O | **+** |  |  | **+** |  |  |  |  |  |  |
| *Aerva javanica (Burm.f.) Juss. ex Schult.* | Amaranthaceae | CH | Shrub | SA+SZ+TR | M, G, F |  | **+** |  | **+** |  |  |  |  |  |  |
| *Agriophyllum minus Fisch. & C.A.Mey. ex Fenzl* | Amaranthaceae | TH | Annual | IT+ES |  |  | **+** | **+** | **+** | **+** |  | **+** |  |  |  |
| *Aizoon canariense L.* | Aizoaceae | HE | Perennial | IT+ME+SA+TR | G, O |  |  |  |  | **+** |  | **+** |  |  |  |
| *Alhagi graecorum Boiss.* | Fabaceae | HE | Shrub | IT+ME+SA+SZ | M,G,E,F,O |  |  |  |  | **+** |  | **+** |  |  |  |
| *Amaranthus graecizans L.* | Amaranthaceae | TH | Annual | COSM | M, G, E |  |  |  |  | **+** | **+** | **+** |  |  |  |
| *Amaranthus hybridus L.* | Amaranthaceae | TH | Annual | COSM | M, G, F, O |  |  |  |  | **+** |  |  |  |  |  |
| *Amaranthus viridis L.* | Amaranthaceae | TH | Annual | COSM | M, G, E, O |  |  |  |  | **+** |  |  |  |  |  |
| *Anabasis articulata (Forssk.) Moq.* | Chenopodiaceae | CH | Shrub | ME+SA | G,F |  |  |  |  |  | + |  |  |  |  |
| *Anabasis ehrenbergii* Schweinf. ex Boiss. | Chenopodiaceae | CH | Shrub | SZ | G, F, O | **+** | **+** |  | **+** |  |  |  |  |  |  |
| *Anabasis setifera Moq.* | Chenopodiaceae | CH | Shrub | SA+IT | G,F |  | **+** |  | **+** | **+** |  | **+** |  |  |  |
| Anastatica hierochuntica L. | Brassicaceae | TH | Annual | SA | M,G,F |  |  |  |  |  |  |  |  |  | + |
| *Anethum graveolens* L. | Apiaceae | TH | Annual | COSM | M, G, E, O |  |  |  |  |  | **+** |  |  |  |  |
| *Apium graveolens L.* | Apiaceae | TH | Annual | COSM | M, G, E, O |  |  |  |  | **+** |  |  |  |  |  |
| *Apocynum ventum L.* | Apocynaceae | PH | Tree | ME+SA+IT | M, F, O |  |  |  |  | **+** | **+** |  |  |  |  |
| *Arnebia hispidissima (Sieber ex Lehm.) A.DC.* | Boraginaceae | TH | Annual | SA+SZ | M, G, O | **+** |  |  | **+** | **+** |  |  |  |  |  |
| *Artemisia sieberi* Besser | Asteraceae | CH | Shrub | ME+SA | M, G, E, O |  |  |  | **+** |  |  |  |  |  |  |
| *Arthrocaulon macrostachyum* (Moric.) Piirainen & G.Kadereit | Chenopodiaceae | CH | Shrub | ME + SA | G,F |  |  |  |  | **+** |  |  |  |  |  |
| *Astragalus arpilobus* subsp. *hauarensis* (Boiss.) Podlech | Fabaceae | HE | Perennial | IT | G,F |  |  |  | **+** |  |  | **+** |  |  |  |
| Astragalus sieberi DC. | Fabaceae | CH | Perennial | ME+SA | M,G |  | + |  |  |  |  |  |  |  | + |
| Astragalus spinosus (Forssk.) Muschl. | Fabaceae | CH | Perennial | ME+SA | M,G |  |  |  |  |  |  |  |  |  | + |
| *Astragalus tribuloides Delile* | Fabaceae | TH | Annual | IT+SA+SZ | M, G, F |  |  |  |  |  | **+** |  |  |  |  |
| *Atriplex turcomanica* (Moq.) Boiss. | Chenopodiaceae | CH | Shrub | SA +IT | M, G |  |  |  | **+** |  |  |  |  |  |  |
| *Bacopa monnieri (L.) Wettst.* | Plantaginaceae | HE | Perennial | TR | G |  |  |  |  | **+** |  |  |  |  |  |
| *Bassia eriophora (Schrad.) Asch.* | Chenopodiaceae | TH | Annual | SA+IT | G |  |  |  |  | + | + | + |  |  |  |
| *Bassia indica (Wight) A.J.Scott* | Chenopodiaceae | TH | Annual | SZ+IT | G |  |  |  |  | **+** |  | **+** |  |  |  |
| *Bassia muricata (L.) Asch.* | Chenopodiaceae | TH | Annual | IT+SA+SZ | G, F | **+** |  |  | **+** | **+** | **+** | **+** |  |  |  |
| *Beta vulgaris L.* | Chenopodiaceae | TH | Annual | ME+ES+IT | G,E |  |  |  |  | **+** | **+** |  |  |  |  |
| Bienertia cycloptera | Chenopodiaceae | TH | Annual | ES+IT |  | + | + |  |  |  |  |  |  |  |  |
| *Blumea bovei* (DC.) Vatke | Asteraceae | CH | Perennial | SA+SZ | G |  |  |  |  |  | + | + |  |  |  |
| Bolboschoenus maritimus (L.) Palla | Cyperaceae | GH | Sedge | COSM | M,G | + |  |  |  | + |  |  |  |  |  |
| *Cakile arabica Velen.* | Brassicaceae | TH | Annual | ME+ES | G |  |  |  |  | **+** |  |  |  |  |  |
| *Calligonum comosum L'Hér.* | Polygonaceae | PH | Shrub | SA+IT | G, F |  |  |  |  |  |  | **+** |  |  |  |
| *Caroxylon arabicum (Botsch.) Akhani & Roalson* | Chenopodiaceae | CH | Shrub | Endemic | G, F, O |  | + |  | + |  |  |  |  |  |  |
| Caroxylon cyclophyllum (Baker) Akhani & Roalson | Chenopodiaceae | CH | Shrub | SA+SZ | F |  |  |  |  |  |  |  |  | + |  |
| *Caroxylon imbricatum (Forssk.) Moq.* | Chenopodiaceae | CH | Shrub | SZ+ SA | G, F, O | **+** | **+** |  | **+** |  |  | **+** |  |  |  |
| *Caroxylon imbricatum var. imbricatum* | Chenopodiaceae | CH | Shrub | SA+SZ | G, F, O |  |  |  |  |  |  | + |  |  |  |
| Caroxylon jordanicola (Eig) Akhani & Roalson | Chenopodiaceae | CH | Shrub | SA | F |  |  |  |  |  |  |  |  |  | + |
| *Caroxylon vermiculatum (L.) Akhani & Roalson* | Chenopodiaceae | CH | Shrub | IT+SA | G, F, O |  |  |  |  | **+** | **+** |  |  |  |  |
| *Caroxylon volkensii (Schweinf. & Asch.) Akhani & Roalson* | Chenopodiaceae | CH | Shrub | SA+ME+IT | G, F, O |  |  |  |  |  |  | **+** |  |  |  |
| *Carthamus oxyacanthus M.Bieb.* | Asteraceae | TH | Annual | IT | G |  |  |  |  | **+** |  | **+** |  |  |  |
| *Centaurea pseudosinaica Czerep.* | Asteraceae | TH | Annual | ME+SA | M, F, O |  |  |  |  | **+** |  |  |  |  |  |
| *Centaurium pulchellum (Sw.) Hayek ex Hand.-Mazz., Stadlm., Janch. & Faltis* | Gentianaceae | TH | Annual | ME +IT+ES |  |  |  |  |  |  |  | **+** |  |  |  |
| *Chenopodiastrum murale* (L.) S.Fuentes, Uotila & Borsch | Chenopodiaceae | TH | Annual | COSM | M, G, E |  |  |  |  | **+** | **+** | **+** |  |  |  |
| *Chenopodium album L.* | Chenopodiaceae | TH | Annual | COSM | M, G, E |  | **+** |  | **+** |  |  |  |  |  |  |
| *Chenopodium vulvaria L.* | Chenopodiaceae | TH | Annual | SZ | G |  |  |  |  | **+** | **+** |  |  |  |  |
| Chrozophora oblongifolia (Del.) A. Juss. ex Spreng. | Euphorbiaceae | CH | Shrub | SZ+TR | M,G |  |  |  |  |  |  | + |  |  | + |
| *Cistanche phelypaea (L.) Cout.* | Orobanchaceae | PA | Parasite | SA+ ME | M,E |  |  |  |  |  |  | **+** |  |  |  |
| *Cistanche tubulosa (Schenk) Wight ex Hook.f.* | Orobanchaceae | PA | Parasite | SA+ME+IT |  |  |  | **+** | **+** |  |  |  |  |  |  |
| *Cleome droserifolia (Forssk.) Delile* | Capparaceae | CH | Perennial | SZ | M |  | **+** |  | **+** |  |  |  |  |  |  |
| *Convolvulus arvensis L.* | Convolvulaceae | HE | Perennial | TR | M, G, F |  |  |  |  | **+** | **+** | **+** |  |  |  |
| *Convolvulus pilosellifolius Desr.* | Convolvulaceae | HE | Perennial | SA+IT | G,F |  |  |  |  | **+** | **+** |  |  |  |  |
| Convolvulus prostratus Forssk. | Convolvulaceae | CH | Shrub | SA+SZ | M,G,F |  |  |  |  |  |  |  |  |  | + |
| *Corchorus olitorius L.* | Tiliaceae | TH | Annual | PAL | M, G, E |  |  |  |  |  | **+** |  |  |  |  |
| *Cornulaca monacantha Delile* | Chenopodiaceae | CH | Shrub | SA+AR+SZ | G, F |  | **+** |  | **+** |  |  | **+** |  |  |  |
| *Cressa cretica L* | Convolvulaceae | HE | Perennial | ME +IT | M |  |  |  |  | **+** | **+** | **+** |  |  |  |
| *Cuscuta campestris Yunck.* | Convolvulaceae | PA | Parasite | ME | G |  |  |  |  |  | **+** | **+** |  |  |  |
| *Cuscuta planiflora Ten.* | Convolvulaceae | PA | Parasite | PAL | G |  |  |  |  | **+** |  |  |  |  |  |
| *Cynanchum acutum L.* | Asclepiadaceae | PH | Tree | ME+IT+ ES | G, E |  |  |  |  | **+** | **+** |  |  |  |  |
| Cynanchum registanense Jayanthi | Asclepiadaceae | HE | Perennial | SA | M |  |  |  |  |  |  | + |  | + |  |
| *Cynomorium coccineum L.* | Cynomoriaceae | PA | Parasite | ME +IT + SA | M,G,E |  |  | **+** | **+** |  |  |  |  |  |  |
| *Datura innoxia Mill.* | Solanaceae | TH | Annual | PAN+PAL | M, E, F |  |  |  |  |  | **+** |  |  |  |  |
| Eclipta alba (L.) Hassk. | Asteraceae | TH | Annual | TR | G |  |  |  |  | + | + |  |  |  |  |
| *Eremobium aegyptiacum (Spreng.) Asch. ex Boiss.* | Brassicaceae | TH | Annual | SA | G |  |  |  |  | **+** |  |  |  |  |  |
| *Eremobium aegyptiacum var. lineare (Delile) Zohary* | Brassicaceae | TH | Annual | SA | M, G | **+** |  |  | **+** |  |  |  |  |  |  |
| *Erigeron bonariensis* L. | Asteraceae | TH | Annual | ME + NEO | M, G, F |  |  |  |  | **+** | **+** | **+** |  |  |  |
| Erodium laciniatum (Cav.) Willd. | Geraniaceae | TH | Annual | ME | G |  |  |  | + |  |  |  |  |  | + |
| *Eruca sativa Mill.* | Brassicaceae | TH | Annual | IT+ ME +SA+ES | M,G,E |  |  |  |  | **+** |  | **+** |  |  |  |
| *Erucastrum arabicum Fisch. & C.A.Mey.* | Brassicaceae | TH | Annual | SA+SZ+PAL | G |  |  |  |  |  | **+** |  |  |  |  |
| *Euphorbia densa Schrenk* | Euphorbiaceae | TH | Annual | IT | M |  |  |  |  |  | **+** | **+** |  |  |  |
| *Euphorbia globosa* (Haw.) Sims | Euphorbiaceae | TH | Annual | SA+SZ | M |  |  |  |  | **+** |  |  |  |  |  |
| Euphorbia granulata Forssk. | Euphorbiaceae | TH | Annual | SA+SZ | M |  |  |  | + |  | + | + |  |  | + |
| Euphorbia helioscopia L. | Euphorbiaceae | TH | Annual | COSM | M |  |  |  |  |  | + | + |  |  |  |
| *Euphorbia heterophylla* var. *cyathophora* (Murray) Griseb. | Euphorbiaceae | TH | Annual | PAN | M |  |  |  |  | **+** |  |  |  |  |  |
| *Euphorbia larica Boiss.* | Euphorbiaceae | PH | Tree | SZ | M | **+** | **+** |  | **+** |  |  |  |  |  |  |
| *Euphorbia peplus L.* | Euphorbiaceae | TH | Annual | ES+ ME +IT. | M |  |  |  |  | **+** | **+** |  |  |  |  |
| *Farsetia aegyptia Turra* | Brassicaceae | CH | Perennial | SZ | M, G |  |  |  |  | **+** |  |  |  |  |  |
| *Farsetia stylosa R.Br.* | Brassicaceae | CH | Perennial | SA+SZ | G |  |  |  | **+** |  |  |  |  |  |  |
| *Ficus palmata Forssk.* | Moraceae | Ph | Tree | SZ | M, G, E, F, O |  |  |  |  | **+** |  |  |  |  |  |
| *Flaveria trinervia* (Spreng.) C.Mohr | Asteraceae | CH | Perennial | SZ+TR | G |  |  |  |  | **+** | **+** | **+** |  |  |  |
| *Frankenia pulverulenta L.* | Frankeniaceae | TH | Annual | ME +IT+ES |  | **+** | **+** |  |  |  |  | **+** |  |  |  |
| *Gastrocotyle hispida (Forssk.) Bunge* | Boraginaceae | HE | Perennial | IT+ME+SA+SZ | M, F |  |  |  | **+** |  |  |  |  |  |  |
| *Glycyrrhiza glabra L.* | Fabaceae | HE | Perennial | IT |  |  |  |  |  | **+** |  |  |  |  |  |
| *Gymnarrhena micrantha* Desf. | Asteraceae | TH | Annual | SA | G |  |  |  | **+** |  |  |  |  |  |  |
| *Gypsophila capillaris (Forssk.) C.Chr.* | Scrophulariaceae | TH | Annual | SA |  |  |  |  | **+** |  |  |  |  |  |  |
| *Halocnemum strobilaceum (Pall.) M.Bieb.* | Chenopodiaceae | CH | Shrub | IT +SA+ME + ES | G | **+** | **+** | **+** | **+** |  |  |  |  |  |  |
| *Halopeplis perfoliata (Forssk.) Bunge ex Ung.-Sternb.* | Chenopodiaceae | CH | Shrub | SA +IT |  | **+** |  |  |  |  |  |  |  |  |  |
| Halothamnus bottae Jaub. Et Spach | Chenopodiaceae | CH | Shrub | Near endemic |  |  |  |  |  |  |  |  |  | + |  |
| Haloxylon persicum Bge. | Chenopodiaceae | PH | Tree | SA | G,F |  |  |  | + |  |  |  |  |  |  |
| *Haloxylon salicornicum (Moq.) Bunge ex Boiss.* | Chenopodiaceae | CH | Shrub | SZ | M, G, E, F, O |  |  |  | **+** |  |  |  |  |  |  |
| *Haplophyllum tuberculatum (Forssk.) A.Juss.* | Rutaceae | HE | Perennial | SA | M |  |  |  | **+** |  |  | **+** |  |  |  |
| *Helianthemum lippii (L.) Dum.Cours.* | Cistaceae | CH | Perennial | IT+ME+SA+SZ | G | **+** |  |  |  |  |  |  |  |  |  |
| *Heliotropium bacciferum Forssk.* | Boraginaceae | CH | Shrub | SZ | M, F | **+** | **+** |  | **+** |  |  | **+** |  |  |  |
| *Heliotropium digynum (Forssk.) Asch. ex C.Chr.* | Boraginaceae | CH | Shrub | SA+SZ | M, F |  |  |  |  | **+** |  | **+** |  |  |  |
| *Heliotropium europaeum L.* | Boraginaceae | TH | Annual | ME+IT+ES+PAN | M, F |  |  |  | + |  |  | + |  |  |  |
| *Heliotropium lasiocarpum Fisch. & C.A.Mey.* | Boraginaceae | CH | Shrub | SA | M, F |  |  |  | **+** |  | **+** |  |  |  |  |
| *Herniaria hirsuta L.* | Caryophyllaceae | TH | Annual | SA+ME+IT |  | **+** |  |  |  |  |  |  |  |  |  |
| Horwoodia dicksoniae Turrill | Brassicaceae | TH | Annual | Near endemic |  |  |  |  |  |  |  |  |  |  | + |
| *Ifloga spicata (Forssk.) Sch.Bip.* | Asteraceae | TH | Annual | SA | G | **+** |  |  | **+** |  |  |  |  |  |  |
| *Lactuca saligna L.* | Asteraceae | TH | Annual | ME | G |  |  |  |  | **+** | **+** |  |  |  |  |
| Lactuca serriola L. | Asteraceae | CH | Perennial | ME+IT | M |  |  |  |  | + |  | + | + |  |  |
| *Launaea capitata (Spreng.) Dandy* | Asteraceae | HE | Perennial | SA+SZ | G | **+** |  |  | **+** | **+** |  | **+** |  |  |  |
| *Launaea mucronata (Forssk.) Muschl.* | Asteraceae | CH | Perennial | ME+SA | F, O | **+** | **+** | **+** | **+** | **+** |  | **+** |  |  |  |
| *Launaea nudicaulis (L.) Hook.f.* | Asteraceae | HE | Perennial | SZ+TR | M, G, E, F, O |  |  |  |  | **+** | **+** | **+** |  |  |  |
| *Launaea procumbens (Roxb.) Ramayya & Rajagopal* | Asteraceae | HE | Perennial | SA+IT | F, O |  |  |  |  | **+** |  |  |  |  |  |
| Lawsonia inermis L. | Lythraceae | CH | Shrub | SA+TR | M,G,O |  |  |  |  |  |  |  | + |  |  |
| *Lepidium aucheri Boiss.* | Brassicaceae | TH | Annual | ME | G |  |  |  |  |  |  | **+** |  |  |  |
| *Leptadenia pyrotechnica (Forssk.) Decne.* | Asclepiadaceae | CH | Shrub | SA+SZ | M, G, F |  | **+** |  | **+** |  |  |  |  |  |  |
| Limeum arabicum Friedrich | Caryophyllaceae | CH | Shrub | Near endemic |  |  |  |  | + |  |  |  |  |  |  |
| *Limonium axillare (Forssk.) Kuntze* | Plumbaginaceae | GH | Shrub | SA | G |  | **+** |  | **+** |  |  |  |  |  |  |
| *Lotus halophilus Boiss. & Spruner* | Fabaceae | TH | Annual | ME+ SA | G, F, O |  |  |  |  |  |  | **+** |  |  |  |
| *Lycium shawii Roem. & Schult.* | Solanaceae | PH | Tree | SA+SZ | M, G, E, F, O | **+** |  |  | **+** |  |  |  |  |  |  |
| *Lysimachia arvensis* (L.) U.Manns & Anderb. | Primulaceae | TH | Annual | COSM | M |  |  |  |  |  | **+** | **+** |  |  |  |
| Lythrum hyssopifolia L. | Lythraceae | TH | Annual | SA+ME+IT+PAN | G | + |  |  |  | + |  |  |  |  |  |
| Malva ludwigii (L.) Soldano, Banfi & Galasso | Malvaceae | TH | Annual | SA | M,G,F |  |  |  |  |  |  |  |  |  | + |
| *Malva parviflora L.* | Malvaceae | TH | Annual | ME +IT | M, G, E |  |  |  |  | **+** | **+** | **+** |  |  |  |
| Matthiola arabica Boiss. | Brassicaceae | CH | Shrub | Near endemic | M,G,F |  |  |  | + |  |  |  |  |  |  |
| Matthiola longipetala (Vent.) DC. | Brassicaceae | TH | Annual | SA+IT+PAN | M,G |  |  |  | + |  |  |  |  |  | + |
| *Medicago sativa L.* | Fabaceae | TH | Annual | ES+ME+IT | G, F, O |  |  |  |  | **+** |  |  |  |  |  |
| *Melilotus indicus (L.) All.* | Fabaceae | TH | Annual | ME +IT + SA | G, F, O |  |  |  |  | **+** | **+** | **+** |  |  |  |
| Mentha x villosa Huds. | Lamiaceae | CH | Perennial | ES | M,G,E,O |  |  |  |  |  | + |  |  |  |  |
| *Moltkiopsis ciliata (Forssk.) I.M.Johnst.* | Boraginaceae | CH | Perennial | ME+SA+SZ | G |  |  |  | **+** |  |  |  |  |  |  |
| *Monsonia nivea (Decne.) Webb* | Geraniaceae | HE | Perennial | SA | M,G | **+** |  |  | **+** |  |  |  |  |  |  |
| Myriophyllum spicatum L. | Haloragaceae | HH | Hydrophte | COSM | M,G |  |  |  |  | + |  |  |  | + | + |
| *Neltuma juliflora (Sw.) Raf.* | Fabaceae | PH | Tree | SA | F |  |  |  |  |  |  | **+** |  |  |  |
| *Neurada procumbens L.* | Neuradaceae | TH | Annual | SA+SZ | G | **+** |  |  | **+** |  |  |  |  |  |  |
| *Ochradenus baccatus Delile* | Resedaceae | CH | Shrub | SA+SZ | M, G |  |  |  | **+** | **+** |  |  |  |  |  |
| Ocimum basilicum L. | Lamiaceae | CH | Perennial | SZ | M,G,E,O |  |  |  |  |  | + |  |  |  |  |
| *Oligomeris linifolia (Vahl ex Hornem.) J.F.Macbr.* | Resedaceae | TH | Annual | PAN+SA | G | **+** |  |  | **+** |  |  | **+** |  |  |  |
| *Orobanche cernua Loefl.* | Orobanchaceae | PA | Parasite | IT+ME+SA | M |  | **+** |  | **+** | **+** |  |  |  |  |  |
| *Oxybasis glauca* (L.) S.Fuentes, Uotila & Borsch | Chenopodiaceae | TH | Annual | ES+ ME | M, G, E |  |  |  |  |  | **+** | **+** |  |  |  |
| Pergularia tementosa L. | Apocynaceae | CH | Perennial | SZ | M,G,F |  |  |  |  |  |  |  |  |  | + |
| *Phyla nodiflora (L.) Greene* | Verbinaceae | HE | Perennial | ME +IT +PAL+NEO | G,F |  |  |  |  | **+** |  | **+** |  |  |  |
| Picris babylonica Hand. Mazz. | Asteraceae | TH | Annual | ME+SA | M,G |  |  |  |  | + |  |  |  |  | + |
| *Picris cyanocarpa Boiss.* | Asteraceae | TH | Annual | SZ | G |  |  |  |  |  | **+** | **+** |  |  |  |
| *Picris sulphurea Delile* | Asteraceae | TH | Annual | SA | G |  |  |  |  |  | + | + |  |  |  |
| *Plantago albicans L.* | Plantaginaceae | TH | Annual | IT+ME | G |  |  | **+** | **+** | **+** |  |  |  |  |  |
| Plantago amplexicaulis Cav. | Plantaginaceae | TH | Annual | ME+SA+SZ | M,G |  |  |  | + |  |  |  |  | + | + |
| Plantago ciliata Desf. | Plantaginaceae | TH | Annual | SA+SZ+IT | M,G |  |  |  |  |  |  |  |  |  | + |
| *Plantago lagopus* | Plantaginaceae | TH | Annual | ME+IT | G |  |  |  |  |  | + | + |  |  |  |
| *Plantago lanceolata L.* | Plantaginaceae | TH | Annual | COSM | G |  |  |  |  |  | **+** |  |  |  |  |
| *Plantago major L.* | Plantaginaceae | HE | Perennial | ES +ME +IT | G |  |  |  |  | **+** | **+** | **+** |  |  |  |
| *Plantago ovata Forssk.* | Plantaginaceae | TH | Annual | IT+ME+SA+SZ | M, G |  |  |  |  |  |  | **+** |  |  |  |
| Pluchea dioscoridis (L.) DC. | Asteraceae | PH | Shrub | SA+SZ | G,F |  |  |  |  | + |  | + |  |  |  |
| Polygonum argyrocoleon Steud. ex Kunze | Polygonaceae | TH | Annual | SA+IT | G |  |  |  |  |  | + | + |  |  |  |
| *Polygonum bellardii All.* | Polygonaceae | TH | Annual | IT + ME+ ES | G |  |  |  |  |  | **+** |  |  |  |  |
| *Portulaca oleracea L.* | Portulacaceae | TH | Annual | COSM | M, G, E |  |  |  |  | **+** | **+** | **+** |  |  |  |
| *Prosopis farcta (Banks & Sol.) J.F.Macbr.* | Fabaceae | PH | Tree | SA+ME+IT | F |  |  |  |  | **+** |  | **+** |  |  |  |
| Prosopis koelziana Burkart | Fabaceae | PH | Tree | SA | M,G,F,O |  |  |  | + |  |  |  |  |  |  |
| Pulicaria arabica (L.) Cass. | Asteraceae | CH | Perennial | SA+SZ | M,G,E,F |  |  |  |  |  | + |  |  |  |  |
| Pulicaria undulata (L.) C.A. Meyer | Asteraceae | CH | Shrub | SA+SZ | M,G,E,F |  |  |  |  |  |  |  |  |  | + |
| *Ranunculus muricatus L.* | Ranunculaceae | TH | Annual | ME+IT |  |  |  |  |  |  | **+** |  |  |  |  |
| Raphanus raphanistrum subsp. sativus (L.) Domin | Brassicaceae | TH | Annual | COSM | M,G,F,O |  |  |  |  |  | + |  |  |  |  |
| *Reichardia tingitana (L.) Roth* | Asteraceae | TH | Annual | SA +IT | G |  |  |  |  | **+** | **+** | **+** |  |  |  |
| Reseda arabica Boiss. | Resedaceae | TH | Annual | SA | G |  |  |  |  |  |  |  | + |  |  |
| Rhamphospermum arvense (L.) Besser | Brassicaceae | TH | Annual | COSM | M,G,F |  |  |  |  |  | + |  | + |  |  |
| *Rhazya stricta Decne.* | Apocynaceae | CH | Shrub | SA | G |  |  |  | **+** |  |  |  |  |  |  |
| *Ricinus communis L.* | Euphorbiaceae | PH | Tree | SZ | M,E,F,O |  |  |  |  | **+** | **+** |  |  |  |  |
| *Rumex dentatus L.* | Polygonaceae | TH | Annual | ME +IT + ES | M,G,E |  |  |  |  | **+** | **+** |  |  |  |  |
| Rumex spinosus L. | Polygonaceae | TH | Annual | COSM | M, G, E, O |  |  |  | + |  |  | + |  |  |  |
| *Rumex vesicarius L.* | Polygonaceae | TH | Annual | ME+SA+SZ | M, G, E, O |  |  |  | **+** |  | **+** |  |  |  |  |
| Salix acmophylla Boiss. | Salicaceae | PH | Tree | SA+IT | M,G,F,O |  |  |  |  | + |  |  |  |  |  |
| Salsola drummondii Ulbrich | Chenopodiaceae | CH | Shrub | SA | F |  | + |  |  |  |  |  |  | + |  |
| Salvadora persica L. | Salvadoraceae | PH | Tree | SA | M,G,F,O |  |  | + |  |  |  |  |  |  |  |
| *Samolus valerandi L.* | Primulaceae | TH | Annual | ME+IT |  |  |  |  |  |  | **+** |  |  |  |  |
| *Savignya parviflora (Delile) Webb* | Brassicaceae | TH | Annual | SA+IT | G | **+** |  |  |  |  |  | **+** |  |  |  |
| Seetzenia lanata (Willd.) Bullock | Zygophyllaceae | HE | Perennial | SZ | M,G |  | + |  |  |  |  |  |  |  |  |
| Senna italica Mill. | Fabaceae | HE | Shrub | SA+SZ+TR | M,G,F,O |  |  |  |  |  |  |  |  |  | + |
| Silene arabica Boiss. | Caryophyllaceae | TH | Annual | SA | G |  |  |  | + |  |  |  |  |  |  |
| *Silene linearis Decne.* | Caryophyllaceae | TH | Annual | ME+SA | G |  |  |  |  |  | **+** |  |  |  |  |
| *Silene villosa Forssk.* | Caryophyllaceae | TH | Annual | SA |  |  |  |  | **+** |  |  |  |  |  |  |
| *Sisymbrium irio L.* | Brassicaceae | TH | Annual | IT+ME | M, G, E |  |  |  |  | **+** |  |  |  |  |  |
| *Soda rosmarinus (Bunge ex Boiss.) Akhani* | Chenopodiaceae | CH | Shrub | SA+IT |  | **+** | **+** |  | **+** |  |  |  |  |  |  |
| *Solanum nigrum L.* | Solanaceae | CH | Perennial | IT+ME | M, G, E |  |  |  |  |  |  | **+** |  |  |  |
| *Sonchus asper (L.) Hill* | Asteraceae | TH | Annual | ME +IT. | M,G,E |  |  |  |  |  |  | **+** |  |  |  |
| Sonchus maritimus L. | Asteraceae | TH | Annual | ME+SA | M,G,E |  |  |  |  |  | + | + |  |  |  |
| *Sonchus oleraceus L.* | Asteraceae | TH | Annual | ES+ ME+IT | M,G,E | **+** | **+** |  |  | **+** | **+** | **+** |  |  |  |
| *Spergularia diandra (Guss.) Heldr.* | Caryophyllaceae | TH | Annual | ME +IT+ SA | G, F |  |  |  |  |  | **+** |  |  |  |  |
| *Spergularia flaccida (Madden) I.M.Turner* | Caryophyllaceae | TH | Annual | SA+SZ+ME | G |  |  |  |  | **+** |  |  |  |  |  |
| *Spergularia marina (L.) Besser* | Caryophyllaceae | HE | Perennial | ES+ME+IT | G, F | **+** | **+** |  |  |  | **+** | **+** |  |  |  |
| *Stellaria media (L.) Vill.* | Caryophyllaceae | TH | Annual | COSM | G |  |  |  |  |  | **+** |  |  |  |  |
| *Suaeda aegyptiaca (Hasselq.) Zohary* | Chenopodiaceae | CH | Shrub | SA | M |  |  |  | **+** | **+** | **+** | **+** |  |  |  |
| Suaeda fruticosa Forssk. ex J.F.Gmel. | Chenopodiaceae | CH | Shrub | SA | F |  | + |  |  |  |  |  | + |  |  |
| *Suaeda maritima (L.) Dumort.* | Chenopodiaceae | TH | Annual | COSM | M | **+** | **+** |  | **+** |  |  |  |  |  |  |
| *Suaeda monoica Forssk. ex J.F.Gmel.* | Chenopodiaceae | PH | Tree | IT+SA+SZ | G, F |  |  |  |  |  |  | **+** |  |  |  |
| *Suaeda vermiculata Forssk. ex J.F.Gmel.* | Chenopodiaceae | CH | Shrub | SA+SZ | G, F | **+** | **+** |  | **+** |  | **+** | **+** |  |  |  |
| *Symphyotrichum squamatum (Spreng.) G.L.Nesom* | Asteraceae | HE | Perennial | PAN |  |  |  |  |  |  |  | **+** |  |  |  |
| *Tamarix aphylla (L.) H.Karst.* | Tamaricaceae | PH | Tree | SZ+ SA | M, G, F, O | **+** | **+** |  | **+** | **+** |  |  |  |  |  |
| *Tamarix aucheriana (Decne. ex Walp.) B.R.Baum* | Tamaricaceae | PH | Tree | ME | M, F, O | **+** | **+** | **+** | **+** |  |  | **+** |  |  |  |
| *Tamarix nilotica (Ehrenb.) Bunge* | Tamaricaceae | PH | Tree | SZ+ SA | M, G, F, O |  |  |  |  | + |  | + | + |  |  |
| *Tamarix passerinoides Delile ex Decne.* | Tamaricaceae | PH | Tree | SZ+ SA | M, G, F, O |  |  |  |  |  |  | + |  |  |  |
| Tamarix pycnocarpa DC. | Tamaricaceae | PH | Tree | IT | M,G,F,O |  | + |  |  |  |  |  | + |  |  |
| *Tamarix senegalensis DC.* | Tamaricaceae | PH | Tree | SA | M, G, F, O |  |  |  |  | **+** |  | **+** |  |  |  |
| Trachyspermum ammi (L.) Sprague | Apiaceae | TH | Annual | SA | M,G |  |  |  |  |  |  | + |  |  |  |
| *Traganum nudatum Delile* | Asteraceae | CH | Shrub | ME+SA | G, F, O |  | + |  |  |  |  |  |  |  |  |
| Tribulus arabicus Hosni s.l. | Zygophyllaceae | CH | Perennial | SA | G,O |  |  |  | + |  |  |  |  |  |  |
| *Tribulus terrestris L.* | Zygophyllaceae | TH | Annual | ES+IT+SZ | M, G |  |  |  |  | **+** |  | **+** |  |  |  |
| Trigonella glabra Thunb. subsp. glabra | Fabaceae | TH | Annual | SA+SZ | M,G |  |  |  | + |  | + | + |  |  | + |
| Urospermum picroides (L.) Schmidt | Asteraceae | TH | Annual | ME+IT | M,G,E |  |  |  |  |  | + | + |  |  |  |
| Vachellia flava (Forssk.) Kyal. & Boatwr. | Fabaceae | PH | Tree | SA+SZ | M,G,F,O |  |  |  |  |  |  |  |  |  | + |
| *Veronica anagallis-aquatica L.* | Plantaginaceae | GH | Perennial | COSM | G |  |  |  |  |  | **+** |  |  |  |  |
| *Visnaga daucoides* Gaertn. | Lamiaceae | TH | Annual | ME+IT+SZ+ES | M,E |  |  |  |  |  | + |  |  |  |  |
| *Withania somnifera (L.) Dunal* | Solanaceae | CH | Shrub | ME+IT+PAL | M, G, E, F |  |  |  |  | **+** |  | **+** |  |  |  |
| *Ziziphus spina-christi (L.) Desf.* | Rhamnaceae | PH | Tree | SA+SZ | M, G, E |  |  |  |  |  | **+** | **+** |  |  |  |
| *Zygophyllum bruguieri* (DC.) Christenh. & Byng | Zygophyllaceae | CH | Perennial | IT+SA | M | **+** |  |  | **+** |  |  |  |  |  |  |
| *Zygophyllum coccineum L.* | Zygophyllaceae | CH | Shrub | SZ | G,O | **+** | **+** |  | **+** |  |  |  |  |  |  |
| *Zygophyllum glutinosum* (Delile) Christenh. & Byng | Zygophyllaceae | CH | Perennial | SA | M |  |  |  | **+** |  |  |  |  |  |  |
| *Zygophyllum hamiense Schweinf.* | Zygophyllaceae | CH | Shrub | SA+SZ |  | + | + | + | + |  |  |  |  |  |  |
| *Zygophyllum indicum* (Burm.f.) Christenh. & Byng | Zygophyllaceae | CH | Perennial | IT+SA | M |  | **+** |  | **+** | **+** |  |  |  |  |  |
| *Zygophyllum mandavillei Hadidi* | Zygophyllaceae | CH | Shrub | Endemic | G,O | **+** | **+** |  | **+** |  |  |  |  |  |  |
| *Zygophyllum qatarense Hadidi* | Zygophyllaceae | CH | Shrub | Near endemic | G,O | **+** | **+** |  | **+** | **+** |  | **+** |  |  |  |
| *Zygophylum simplex L.* | Zygophyllaceae | TH | Annual | SA+SZ | G,O | **+** | **+** |  | **+** |  |  |  |  |  |  |
| **Monoctyledonae** |  |  |  |  |  |  |  |  |  |  |  |  |  |  |  |
| *Aeluropus lagopoides (L.) Thwaites* | Poaceae | GH | Grass | SA+ IT+ME+SZ | G | **+** | **+** | **+** | **+** | **+** |  | **+** |  |  |  |
| *Aeluropus littoralis (Gouan) Parl.* | Poaceae | GH | Grass | ME + IT | G | **+** | **+** |  | **+** | **+** | **+** |  |  |  |  |
| *Allium atroviolaceum Boiss.* | Amarallydaceae | GH | Perennial | SA+ME | M,E |  |  |  | **+** |  | **+** |  |  |  |  |
| *Allium vineale* L. | Amarallydaceae | GH | Perennial | ME+ES+PAN | M,E |  |  |  |  |  | + |  |  |  |  |
| Anacamptis palustris (Jacq.) R.M.Bateman, Pridgeon & M.W.Chase | Orchidaceae | GH | Perennial | ME+SA+ES | M,O |  |  |  |  | + |  |  |  |  |  |
| Arundo donax L. | Poaceae | PH | Grass | COSM | M,G,F,O |  |  |  |  | + | + |  |  |  |  |
| *Asphodelus fistulosus L.* | Asphodalaceae | GH | Perennial | IT+ME+SA | M, G, E, O |  |  |  | **+** |  |  |  |  |  |  |
| *Avena fatua L.* | Poaceae | TH | Grass | ME | G |  |  |  |  | **+** | **+** |  |  |  |  |
| *Carex divisa Huds.* | Cyperaceae | GH | Sedge | ME +IT+ ES | G |  |  |  |  | **+** |  |  |  |  |  |
| *Cenchrus ciliaris L.* | Poaceae | TH | Grass | SA | G | **+** |  |  |  |  |  |  |  |  |  |
| *Cenchrus divisus (J.F.Gmel.) Verloove, Govaerts & Buttler* | Poaceae | HE | Grass | SA | G |  |  |  | **+** |  |  | **+** |  |  |  |
| *Centropodia forskaolii* (Vahl) Cope | Poaceae | CH | Grass | IT+SA | G |  |  | **+** | **+** |  |  |  |  |  |  |
| *Ceratophyllum demersum L.* | Ceratophyllaceae | HH | Hydrophte | COSM | M,G |  |  |  |  | **+** |  |  |  |  |  |
| *Chloris flagellifera (Nees) P.M.Peterson* | Poaceae | HE | Grass | IT+SA+SZ+TR | G |  |  |  |  |  |  | **+** |  |  |  |
| Chloris gayana Kunth | Poaceae | GH | Grass | SZ+TR | M,G |  |  |  |  |  | + | + |  |  |  |
| Chloris virgata Sw. | Poaceae | TH | Grass | COSM | M,G |  |  |  |  |  | + | + |  |  |  |
| Chrysopogon plumulosus Hochst. | Poaceae | GH | Grass | SZ | G |  |  |  |  |  |  |  |  | + |  |
| Cladium mariscus (L.) Pohl. | Cyperaceae | GH | Sedge | COSM | M,G |  |  |  |  | + |  |  |  |  |  |
| *Cynodon dactylon (L.) Pers.* | Poaceae | GH | Grass | TR | G | **+** |  |  |  | **+** | **+** | **+** |  |  |  |
| *Cyperus conglomeratus Rottb.* | Cyperaceae | GH | Sedge | SA+ SZ+ME | M,G | **+** | **+** | **+** | **+** | **+** | **+** |  |  |  |  |
| *Cyperus rotundus L.* | Cyperaceae | GH | Sedge | IT +PAL+NEO + ME | M,G |  |  |  |  | **+** | **+** |  |  |  |  |
| *Dactyloctenium aegyptium (L.) Willd.* | Poaceae | TH | Grass | PAL+ME | G |  |  |  |  | **+** | **+** | **+** |  |  |  |
| Digitaria ciliaris (Retz.) Kpel. | Poaceae | GH | Grass | SA+SZ+TR | M,G |  |  |  |  |  | + | + |  |  |  |
| *Digitaria sanguinalis (L.) Scop.* | Poaceae | TH | Grass | TR | G |  |  |  |  |  | **+** |  |  |  |  |
| *Echinochloa colonum (L.) Link* | Poaceae | TH | Grass | ME +IT + NEO+PAL | G |  |  |  |  |  | **+** | **+** |  |  |  |
| *Eleusine indica (L.) Gaertn.* | Poaceae | TH | Grass | PAL | G |  |  |  |  |  | **+** |  |  |  |  |
| *Eragrostis barrelieri Daveau* | Poaceae | TH | Grass | ME+SA | G |  |  |  |  |  | **+** |  |  |  |  |
| Fimbristylis ferruginea (L.) Vahl | Cyperaceae | GH | Sedge | SA+SZ+TR | M,G |  |  |  |  | + | + |  |  |  |  |
| *Hordeum murinum subsp. leporinum (Link) Arcang.* | Poaceae | TH | Grass | IT + ME. | G |  |  |  |  |  |  | **+** |  |  |  |
| *Imperata cylindrica (L.) Raeusch.* | Poaceae | GH | Grass | ME +IT + SA+PAL + NEO | M,G,F |  |  |  |  | **+** | **+** | **+** |  |  |  |
| *Juncus rigidus Desf.* | Juncaceae | GH | Sedge | ES+ME+IT. | G, O | **+** | **+** | **+** | **+** | **+** |  | **+** |  |  |  |
| *Lasiurus scindicus Henrard* | Poaceae | GH | Grass | SA+SZ | G, E |  |  |  | + | **+** |  | + |  |  |  |
| Leptochloa fucsa (L.) Kunth. | Poaceae | GH | Grass | SA+IT | G |  |  |  |  |  | + | + |  |  |  |
| *Lolium perenne L.* | Poaceae | GH | Grass | SA | G |  |  |  |  |  | **+** | **+** |  |  |  |
| Lolium persicum Boiss. et Hohen. | Poaceae | TH | Grass | SA | G |  |  |  |  |  | + | + | + |  |  |
| *Lolium rigidum Gaudin* | Poaceae | TH | Grass | ME+IT | G |  |  |  | **+** |  | **+** |  |  |  |  |
| Lolium temulentum L. | Poaceae | TH | Grass | COSM | G |  |  |  |  |  | + | + |  |  |  |
| Najas graminae Del. | Najadaceae | HH | Hydrophte | SA+SZ+TR | M,G |  |  |  |  | + |  |  |  |  |  |
| Panicum antidotale Retz. | Poaceae | GH | Grass | SA | M,G |  |  |  |  | + | + | + |  |  |  |
| Panicum miliaceum L. | Poaceae | GH | Grass | ME+IT+ES+PAN | G |  |  |  |  |  | + | + | + |  |  |
| *Panicum repens L.* | Poaceae | GH | Grass | COSM | G |  |  |  |  |  | + |  |  |  |  |
| *Panicum turgidum Forssk.* | Poaceae | GH | Grass | SA+ SZ | M, G, E, F |  |  |  | **+** |  |  | **+** |  |  |  |
| Parapholis incurva (L.) C.E. Hubb. | Poaceae | TH | Grass | ME+SA | G |  |  |  |  |  | + | + |  |  |  |
| Paspalum distichum L. | Poaceae | GH | Grass | TR | G |  |  |  |  | + |  |  |  |  |  |
| *Phalaris minor Retz.* | Poaceae | TH | Grass | ME +IT | G |  |  |  |  | **+** | **+** |  |  |  |  |
| *Phoenix dactylifera L.* | Palmae | PH | Tree | SA+ SZ | M,E |  |  |  |  | **+** | **+** | **+** |  |  |  |
| *Phragmites australis (Cav.) Trin. ex Steud.* | Poaceae | GH | Grass | COSM | M, G, E, F, O | **+** | **+** | **+** | **+** | **+** | **+** | **+** |  |  |  |
| *Polypogon monspeliensis (L.) Desf.* | Poaceae | TH | Grass | ME+IT+SA | M, G | **+** | **+** | **+** |  | **+** | **+** |  |  |  |  |
| Potamogeton nodosus Poir. | Potamogetonaceae | HH | Hydrophte | COSM | M,G |  |  |  |  | + |  |  |  |  |  |
| Rostraria cristata (L.) Tzvelev | Poaceae | TH | Grass | ME+SA | G |  |  |  |  |  | + | + |  |  |  |
| *Rostraria pumila (Lam.) Tzvelev* | Poaceae | TH | Grass | SA+PAN | G |  |  |  |  |  | + |  |  |  |  |
| *Ruppia maritima L.* | Ruppiaceae | HH | Hydrophte | TR | G | **+** |  |  |  | **+** |  |  |  |  |  |
| *Schismus barbatus (L.) Thell.* | Poaceae | TH | Grass | IT + SA +ME | G | **+** | **+** | **+** | **+** |  |  | **+** |  |  |  |
| *Schoenoplectus litoralis (Schrad.) Palla* | Cyperaceae | GH | Sedge | ES+IT | G | **+** |  | **+** |  |  |  |  |  |  |  |
| Schoenus nigricans L. | Cyperaceae | GH | Sedge | COSM | M,G |  |  |  |  | + |  |  |  |  |  |
| Setaria pumila (Poir.) Roem. et Schult. | Poaceae | GH | Grass | COSM | M,G,E |  |  |  |  |  | + | + |  |  |  |
| *Setaria verticillata (L.) P.Beauv.* | Poaceae | TH | Grass | ES + ME | G |  |  |  |  | **+** | **+** | **+** |  |  |  |
| *Setaria viridis (L.) P.Beauv.* | Poaceae | TH | Grass | ES+ME +IT | G |  |  |  |  |  | **+** | **+** |  |  |  |
| Sorghum halepense (L.) Pers. | Poaceae | GH | Grass | COSM | M,G,E,F |  |  |  |  |  | + |  | + |  |  |
| *Sporobolus ioclados (Nees ex Trin.) Nees* | Poaceae | GH | Grass | SA+IT | G |  |  |  |  | **+** |  |  |  |  |  |
| *Sporobolus spicatus (Vahl) Kunth* | Poaceae | GH | Grass | PAL | G |  |  |  | **+** |  |  | **+** |  |  |  |
| *Stipagrostis ciliata (Desf.) De Winter* | Poaceae | HE | Grass | SA | G |  |  |  |  | **+** |  | **+** |  |  |  |
| *Stipagrostis hirtigluma (Steud. ex Trin. & Rupr.) De Winter* | Poaceae | HE | Grass | SA+SZ | G |  |  |  | **+** |  |  |  |  |  |  |
| *Stipagrostis plumosa (L.) Munro ex T.Anderson* | Poaceae | GH | Grass | COSM | G |  |  | **+** | **+** |  |  |  |  |  |  |
| *Stipellula capensis (Thunb.) Röser & Hamasha* | Poaceae | GH | Grass | ME+SA+IT | G |  |  |  |  |  | + |  |  |  |  |
| *Stuckenia pectinata (L.) Börner* | Potamogetonaceae | HH | Hydrophte | TR | G | **+** |  |  |  | **+** |  |  |  |  |  |
| *Typha latifolia L.* | Typhaceae | GH | Perennial | ME +IT + PAL | M, G, E, F, O |  |  |  |  | **+** |  |  |  |  |  |
| Zannichellia palustris L. | Zannichelliaceae | HH | Hydrophte | COSM | M,G |  |  |  |  | + |  |  |  |  |  |
|  |  |  |  |  |  | **37** | **37** | **9** | **7+** | **77** | **66** | **80** | **7** | **6** | **20** |
